# Supplementary material for: VacA promotes CagA accumulation in gastric epithelial cells during Helicobacter pylori infection
Source: PubMed Central journal article supplement (PMC6328614; doi:10.1038/s41598-018-37095-4), 2019-01-10
Supplement: 41598_2018_37095_MOESM1_ESM.pdf [file 41598_2018_37095_MOESM1_ESM.pdf]

## SUPPLEMENTAL INFORMATION

**MANUSCRIPT TITLE:** VacA promotes CagA accumulation in gastric epithelial cells during *Helicobacter pylori* infection

Majd Abdullah<sup>1,2</sup>, Laura K. Greenfield<sup>1,2</sup>, Dana Bronte-Tinkew<sup>1,2</sup>, Mariana I. Capurro<sup>1,2</sup>, David Rizzuti<sup>1,2</sup>, \*Nicola L. Jones<sup>1,2</sup>

<sup>1</sup>Departments of Paediatrics and Physiology, University of Toronto, <sup>2</sup>Cell Biology Program, Research Institute, Hospital for Sick Children, Toronto, Ontario, Canada

## METHODS

### siRNA-mediated gene silencing

Autophagy was inhibited by transfecting AGS cells with a 21-nt siRNA directed to the human autophagic protein Atg12 (NM\_004707). A sense/antisense siRNA pair targeting nucleotides 515 to 533 of Atg12 sequence, GUGGGCAGUAGAGCGAACAUdT, was purchased from Dharmacon Research Inc. Chicago. Non-targeting siRNA #1 (D-001210-01-20) was purchased from Dharmacon Research Inc. and used as a control. siRNA was delivered into AGS cells utilizing RNAiMAX (Thermo Scientific, Napean, Canada). AGS cells that were 50% confluent were treated for 24 hours with 200 pmol of siRNA and 5 µl of RNAiMAX per well of a 6-well culture plate. AGS cells were trypsinized and seeded onto 12-well plates and left to adhere for 24 hours. AGS cells were then infected with a CagA+ *vacA*- isogenic mutant strain for 24 hours before being assessed for inhibition by immunoblotting.

### Transfection

The CagA-GFP construct was kindly provided by Dr. Hitomi Mimuro and constructed as described<sup>1</sup>. Briefly, the *cagA* gene of *H. pylori* NCTC11637 was inserted into pEGFP-C1 (Clontech) for expression of green fluorescent protein (EGFP)-tagged CagA. CagA-GFP was transfected using FuGENE HD transfection reagent (Promega, Madison, Wisconsin, USA) using a ratio of 3:1 (FuGENE:DNA) in AGS cells. After overnight transfection, AGS cells were treated with VacA+ or VacA- CCMS for 24 hours and subsequently underwent immunofluorescence staining.

### Immunofluorescence

Prior to immunofluorescence labeling, cells were washed 3 times with PBS and fixed in 4% paraformaldehyde (Electron Microscopy Sciences, Hatfield, Pennsylvania, USA) for 30 minutes. After fixation, cells were permeabilized in ice-cold methanol for 15 minutes and blocked in 1% bovine serum albumin (BSA) in PBS for 1 hour. LC3 was stained overnight using a rabbit anti-LC3 antibody (1:200) in 5% BSA made in PBS. Cells were then incubated with Alexa Fluor 568 anti-rabbit conjugated antibodies in 1% BSA in PBS. Slides were mounted using DAKO Mounting medium and imaged using a Quorum Spinning Disk Confocal Microscope. Images were acquired using Volocity 3D Image Analysis Software (PerkinElmer, Waltham, Massachusetts, USA).

## REFERENCES

1. Mimuro, H. et al. Grb2 is a key mediator of helicobacter pylori CagA protein activities. *Mol Cell* **10**, 745–755 (2002).

SUPPLEMENTAL DATASET

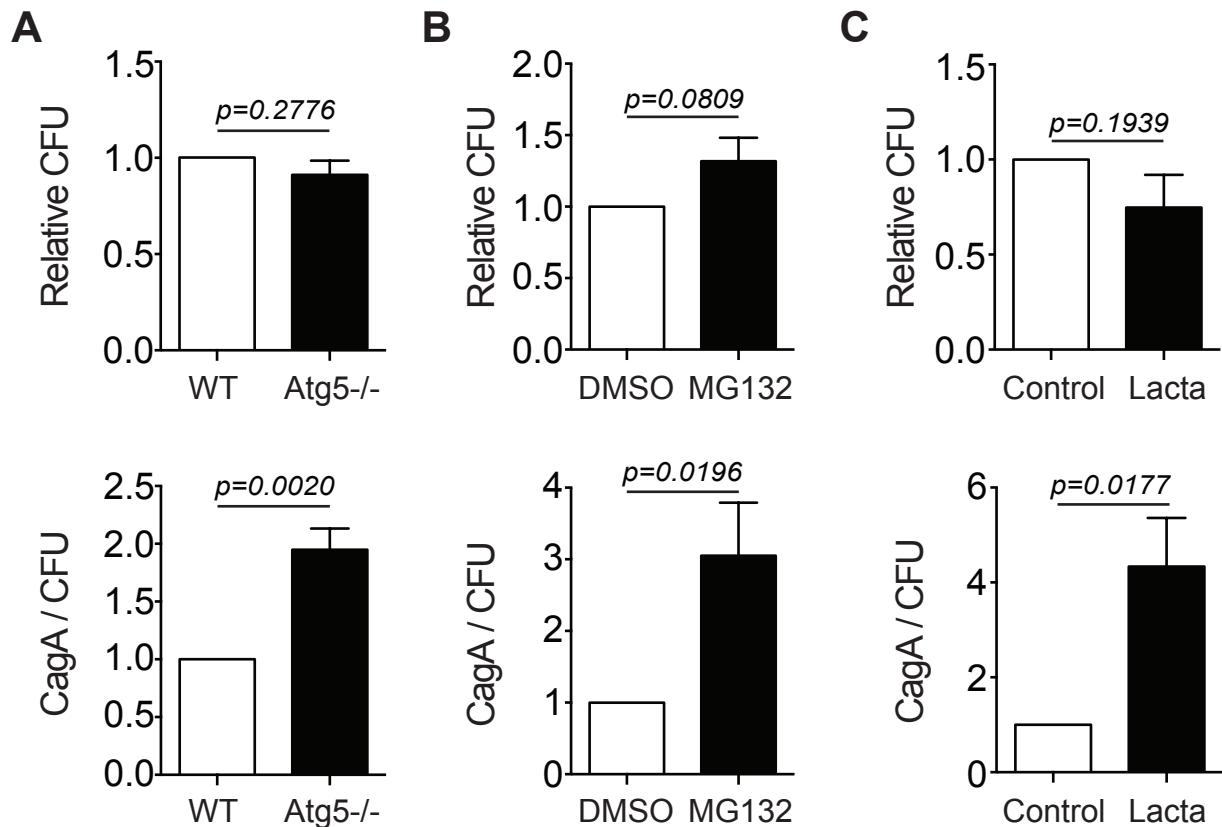

**Figure S1. CagA accumulation is independent of bacterial survival.** Bacterial viability assays were performed in parallel to experiments in Fig. 1 in order to calculate CFU. **(A)** WT and Atg5<sup>-/-</sup> MEFs were infected with a CagA<sup>+</sup> *vacA*<sup>-</sup> isogenic mutant strain (MOI 100) for 8 hours using a gentamycin protection assay. Top graph shows the average CFU relative to WT and the bottom graph shows CagA protein level normalized to  $\beta$ -actin and CFU from each corresponding experiment (mean + SEM; n=4). **(B)** AGS cells were infected with a CagA<sup>+</sup> *vacA*<sup>-</sup> isogenic mutant strain (MOI 50) for 19 hours using a gentamycin protection assay and treated with 5  $\mu$ M MG132 or DMSO control for 14 hours. Top graph shows the average CFU relative to vehicle control and the bottom graph shows CagA protein level normalized to  $\beta$ -actin and CFU from each corresponding experiment (mean + SEM; n=6). **(C)** AGS cells were infected with a CagA<sup>+</sup> *vacA*<sup>-</sup> isogenic mutant strain (MOI 50) for 24 hours using a gentamycin protection assay and treated with 10  $\mu$ M Lactacystin or control for 19 hours. Top graph shows the average CFU relative to vehicle control and the bottom graph shows CagA protein level normalized to  $\beta$ -actin and CFU from each corresponding experiment (mean + SEM; n=4). Statistical analysis was performed using Student's t-test.

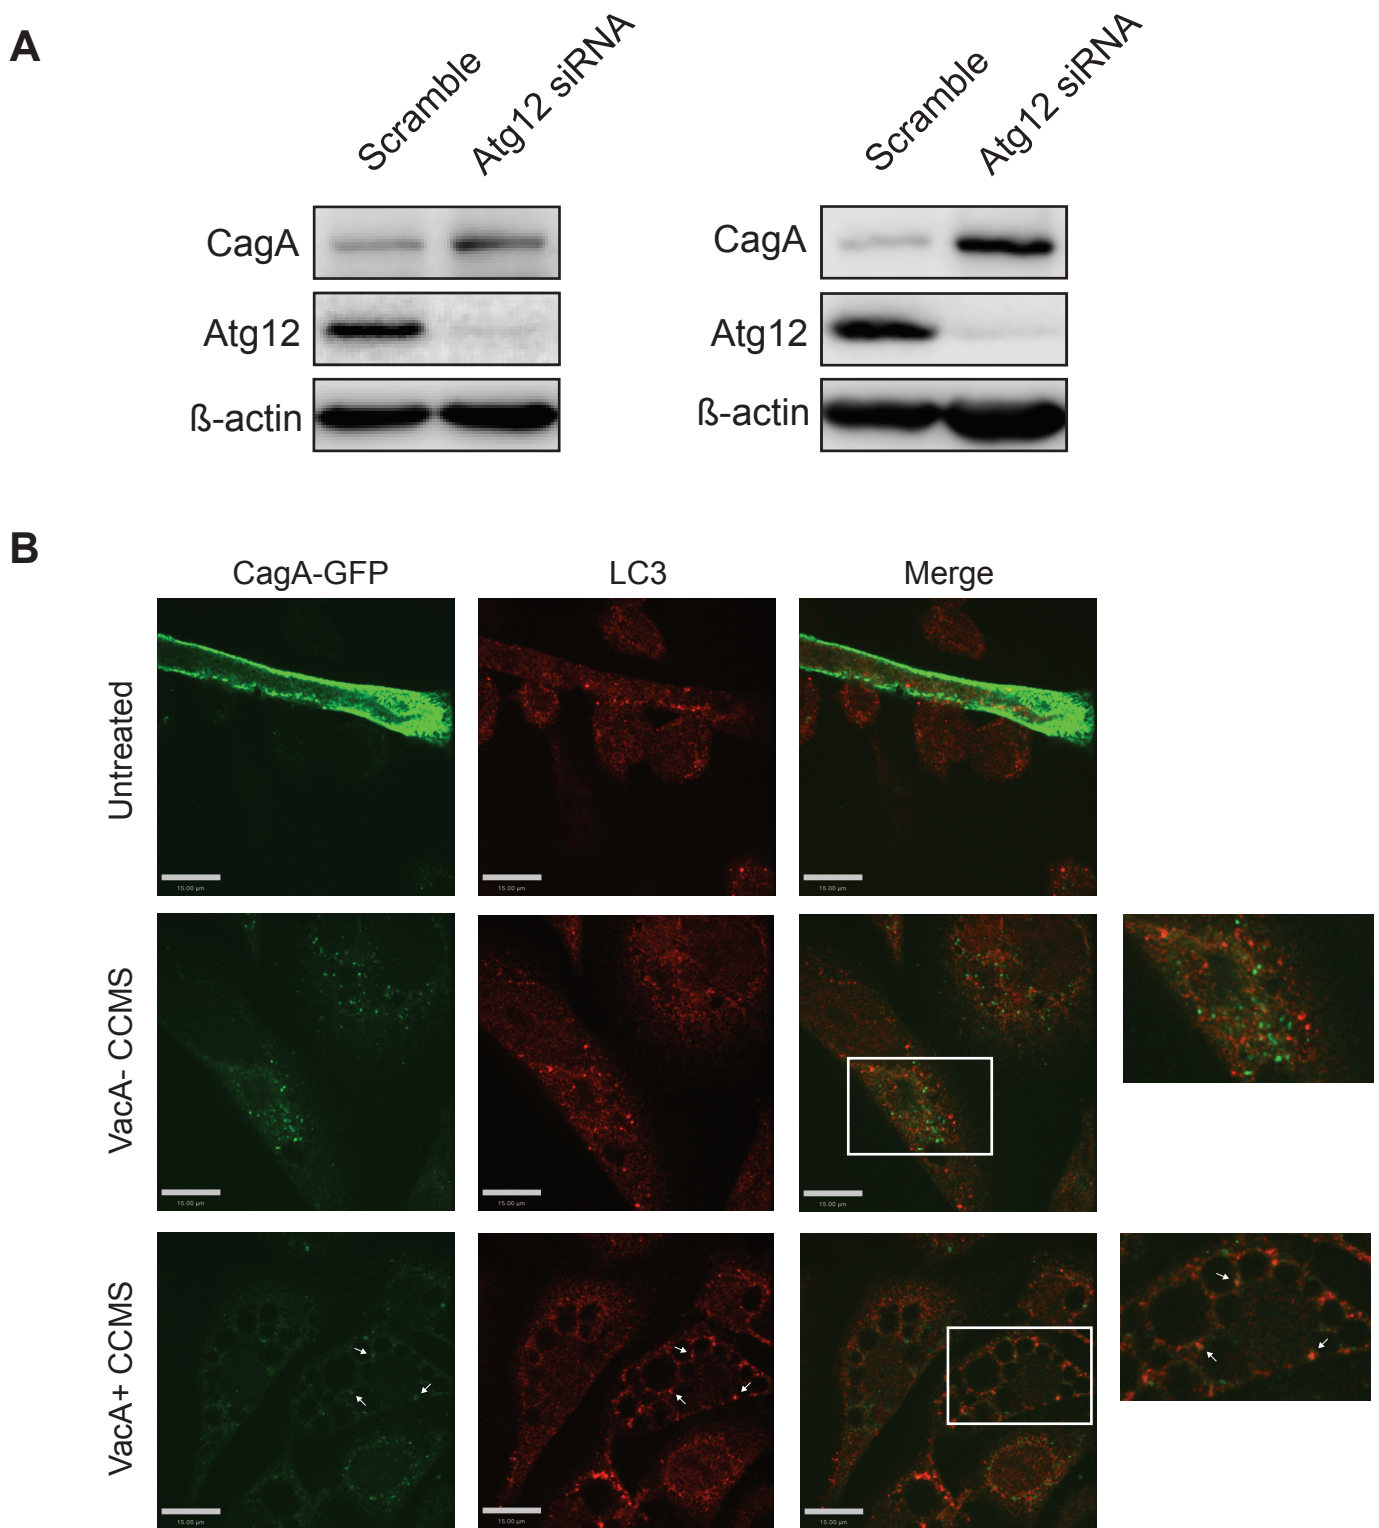

**Figure S2. Inhibition of autophagy promotes CagA accumulation.** (A) AGS cells were transfected with scramble or Atg12 siRNA and infected with a CagA+ *vacA*- isogenic mutant strain for 24 hours using a gentamycin protection assay. Knockdown was assessed by measuring Atg12 protein levels through Western blotting. CagA protein levels were measured by Western blotting using  $\beta$ -actin as loading control (n=2). (B) AGS cells were transfected with CagA-GFP and treated with VacA+ or VacA- CCMS or left untreated for 24 hours and subsequently stained for LC3. Inset shows colocalization of CagA and LC3 with arrows pointing to puncta. Scale bars are 15  $\mu$ m.



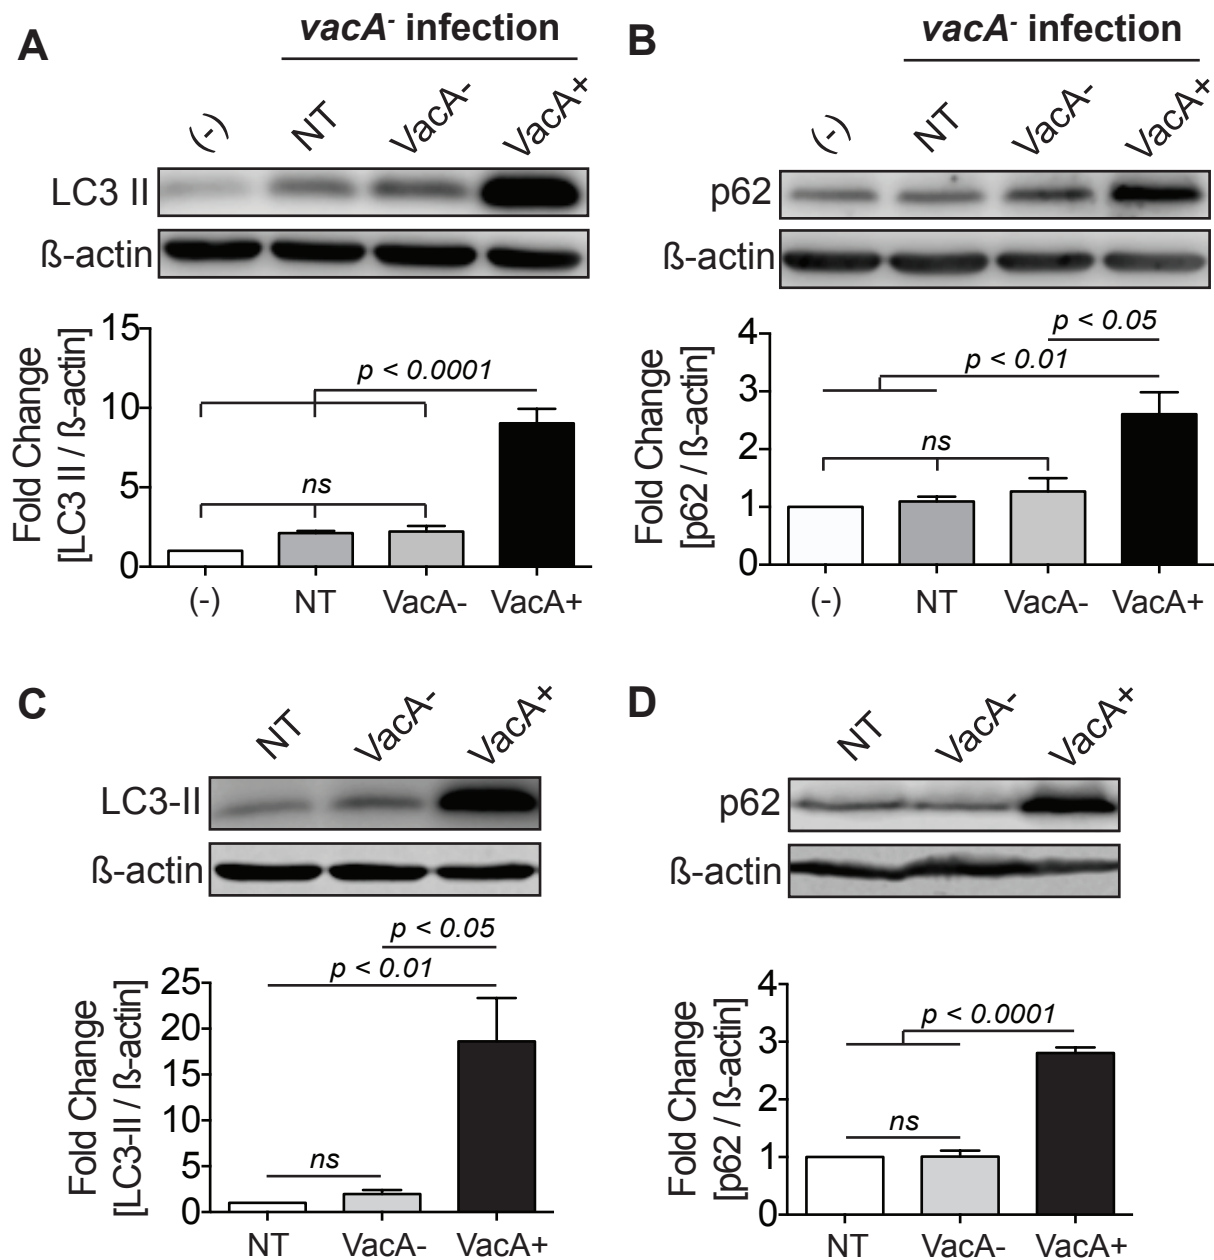

**Figure S3. VacA treatment disrupts autophagic degradation.** (A-B) AGS cells were infected with a CagA<sup>+</sup> *vacA*<sup>-</sup> isogenic mutant strain and co-cultured in the presence or absence of VacA<sup>-</sup> or VacA<sup>+</sup> CCMS for 24 hours using a gentamycin protection assay. NT denotes infection with a CagA<sup>+</sup> *vacA*<sup>-</sup> isogenic mutant strain alone and (-) denotes uninfected control cells. (A) LC3-II was measured by Western blotting using β-actin as a loading control. Graph shows fold change of LC3-II normalized to β-actin relative to uninfected control cells (mean + SEM; n=4). (B) p62 was measured by Western blotting using β-actin as a loading control. Graph shows fold change of p62 normalized to β-actin relative to uninfected control cells (mean + SEM; n=3). (C-D) Ub-G76V-GFP HeLa cells were treated with VacA<sup>+</sup> or VacA<sup>-</sup> CCMS for 32 hours. NT denotes untreated control cells. (C) LC3-II was measured by Western blotting using β-actin as a loading control. Graph shows fold change of LC3-II normalized to β-actin relative to NT (mean + SEM; n=3). (D) p62 was measured by Western blotting using β-actin as a loading control. Graph shows fold change of p62 normalized to β-actin relative to NT (mean + SEM; n=3). Statistical analysis was performed using ANOVA with Tukey's post-hoc test.

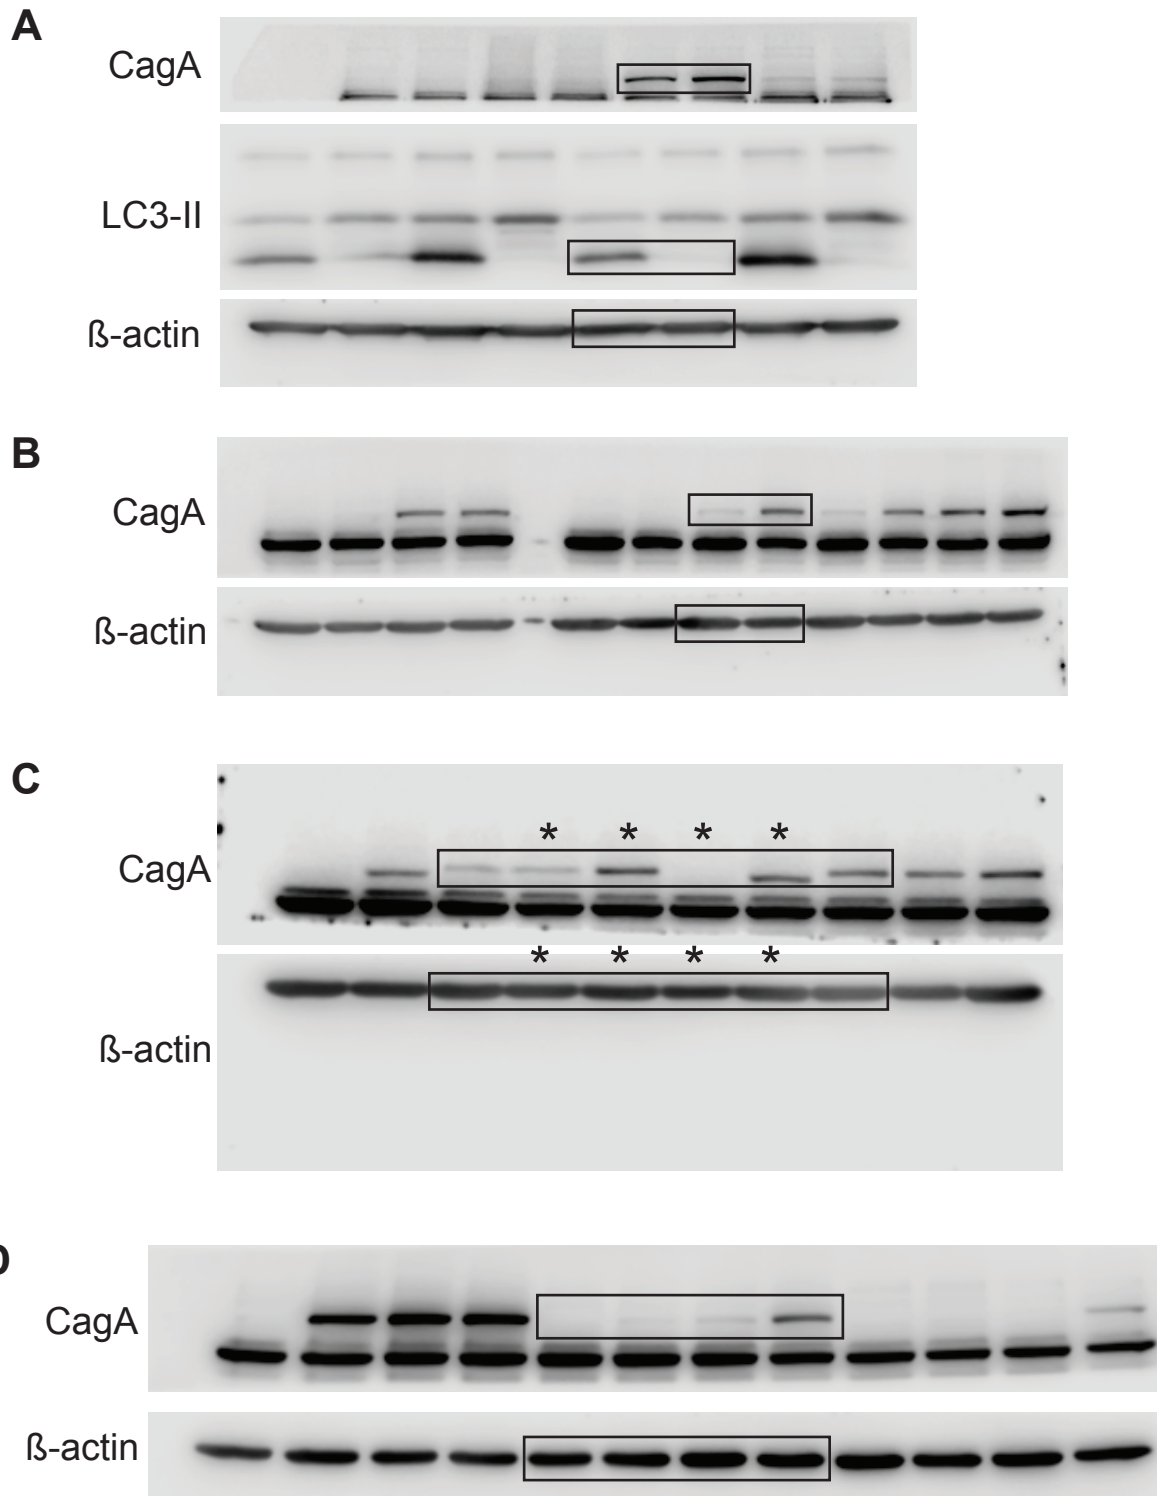

**Figure S4.** Original immunoblots used to crop the gel bands for (A) Figure 1A, (B) Figure 1B, (C) Figure 1C and (D) Figure 2A. \* indicates the lanes removed to splice together the adjacent regions.

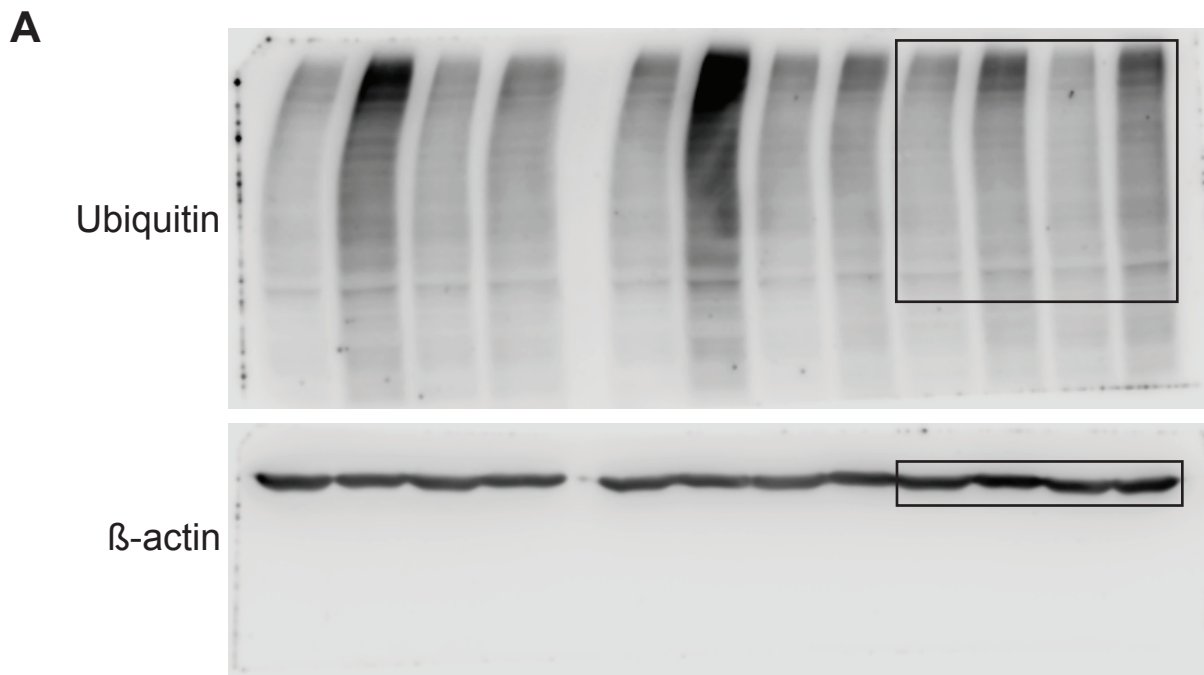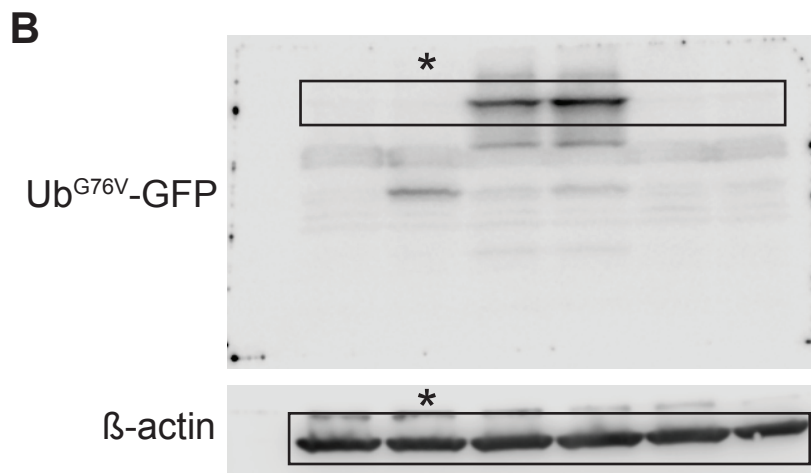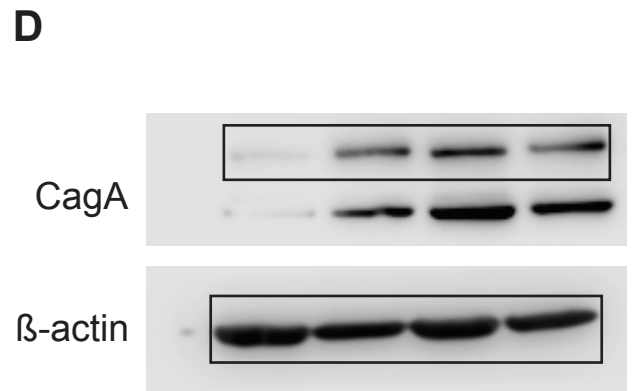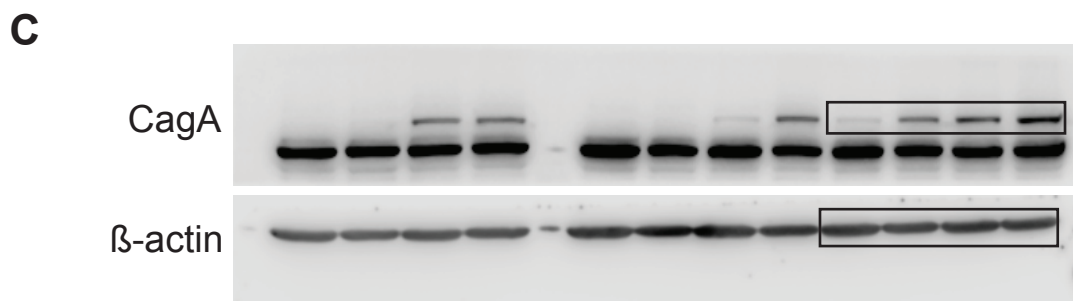

**Figure S5.** Original immunoblots used to crop the gel bands for **(A)** Figure 3A, **(B)** Figure 3B \* indicates the lanes removed to splice together the adjacent regions, **(C)** Figure 4A and **(D)** Figure 4B.

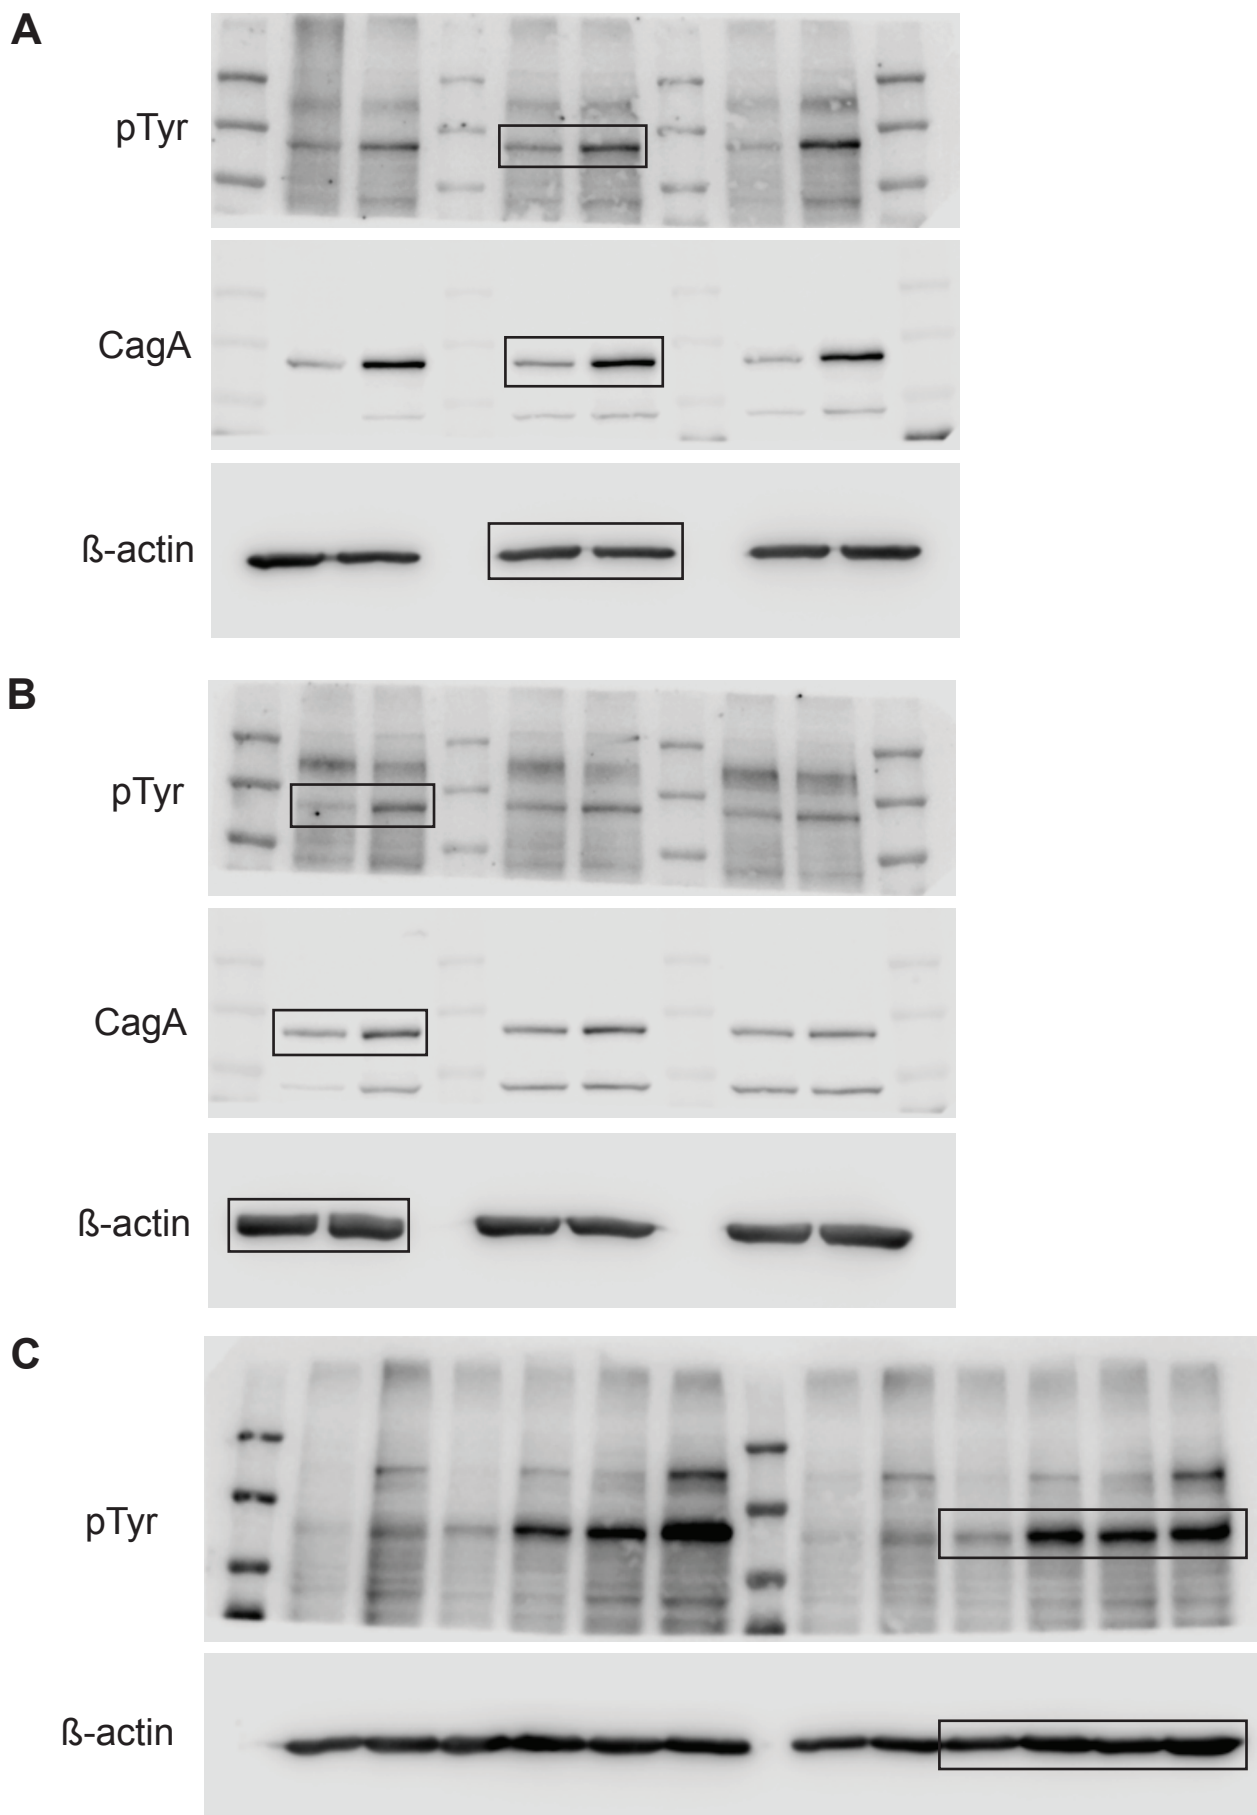

**Figure S6.** Original immunoblots used to crop the gel bands for (A) Figure 5A, (B) Figure 5B and (C) Figure 5C.
